# Supplementary material for: The NGDOs Efficiency: A PROMETHEE Approach
Source: Preprints.org preprint supplement (doi:10.20944/preprints202407.1629.v1), 2024-07-22
Supplement: Supplementary file 1 [file supplementary]

Figure 1: Classification of the NGDO according to their efficiency
